# Supplementary material for: Alteration of Metabolic Syndrome Is Associated with the Decreased Risk of Colorectal Cancer
Source: MDPI journal article supplement (doi:10.3390/jcm12154889), 2023-07-25
Supplement: s1 [file s1]

**Supplementary Table S1.** Multiple comparison results related to Table 1 using the Bonferroni method

|                      | MetS-free<br>vs. MetS-<br>resolved | MetS-free<br>vs. MetS-<br>developed | MetS-free vs.<br>MetS-<br>persistent | MetS-<br>resolved vs.<br>MetS-<br>developed | MetS-resolved<br>vs. MetS-<br>persistent | MetS-<br>developed<br>vs. MetS-<br>persistent |
|----------------------|------------------------------------|-------------------------------------|--------------------------------------|---------------------------------------------|------------------------------------------|-----------------------------------------------|
| Sex, male            | <.0001                             | <.0001                              | <.0001                               | <.0001                                      | <.0001                                   | <.0001                                        |
| Age                  | <.0001                             | <.0001                              | <.0001                               | <.0001                                      | <.0001                                   | <.0001                                        |
| Weight               | <.0001                             | <.0001                              | <.0001                               | <.0001                                      | <.0001                                   | <.0001                                        |
| Height               | <.0001                             | <.0001                              | <.0001                               | <.0001                                      | <.0001                                   | <.0001                                        |
| BMI                  | <.0001                             | <.0001                              | <.0001                               | <.0001                                      | <.0001                                   | <.0001                                        |
| Total<br>cholesterol | <.0001                             | <.0001                              | <.0001                               | <.0001                                      | <.0001                                   | <.0001                                        |
| Smoking              | <.0001                             | <.0001                              | <.0001                               | <.0001                                      | <.0001                                   | <.0001                                        |
| Drink                | <.0001                             | <.0001                              | <.0001                               | <.0001                                      | <.0001                                   | <.0001                                        |
| Exercise             | <.0001                             | <.0001                              | <.0001                               | <.0001                                      | <.0001                                   | <.0001                                        |
| Income               | <.0001                             | <.0001                              | <.0001                               | 1                                           | <.0001                                   | <.0001                                        |
| Waist<br>circum.     | <.0001                             | <.0001                              | <.0001                               | <.0001                                      | <.0001                                   | <.0001                                        |
| SBP                  | <.0001                             | <.0001                              | <.0001                               | <.0001                                      | <.0001                                   | <.0001                                        |
| DBP                  | <.0001                             | <.0001                              | <.0001                               | <.0001                                      | <.0001                                   | <.0001                                        |
| Glucose              | <.0001                             | <.0001                              | <.0001                               | <.0001                                      | <.0001                                   | <.0001                                        |
| TG                   | <.0001                             | <.0001                              | <.0001                               | <.0001                                      | <.0001                                   | <.0001                                        |
| HDL                  | <.0001                             | <.0001                              | <.0001                               | <.0001                                      | <.0001                                   | <.0001                                        |

**Supplementary Table S2.** Hazard ratios and 95% confidence intervals of colorectal cancer occurrence according to the change of metabolic syndrome status and its components

| Change                                    | N         | CRC    | F/U<br>duration <sup>a</sup> | IR   | HR (95% CI)      |                  |                   |  |
|-------------------------------------------|-----------|--------|------------------------------|------|------------------|------------------|-------------------|--|
|                                           |           |        |                              |      | Total            | Male             | Female            |  |
| Metabolic syndrome                        |           |        |                              |      |                  |                  |                   |  |
| Never                                     | 3,481,564 | 7,318  | 8,332,787                    | 0.88 | 0.75(0.73, 0.78) | 0.67(0.64, 0.69) | 0.83(0.79, 0.88)  |  |
| Developed                                 | 760,929   | 2,535  | 1,829,845                    | 1.39 | 0.88(0.84, 0.91) | 0.84(0.79, 0.88) | 0.90(0.85, 0.96)  |  |
| Resolved                                  | 432,190   | 1,616  | 1,043,387                    | 1.55 | 0.91(0.86, 0.95) | 0.89(0.84, 0.95) | 0.87(0.81, 0.95)  |  |
| Persistent                                | 1,029,928 | 4985   | 2,503,339                    | 1.99 | 1 [Reference]    | 1 [Reference]    | 1 [Reference]     |  |
| Abnormal waist circumference <sup>c</sup> |           |        |                              |      |                  |                  |                   |  |
| Never                                     | 4,130,496 | 10,396 | 9,916,033                    | 1.05 | 0.79(0.76, 0.82) | 0.72(0.69, 0.75) | 0.86(0.81, 0.91)  |  |
| Developed                                 | 504,710   | 1,532  | 1,212,377                    | 1.26 | 0.85 (0.81,0.90) | 0.81(0.76, 0.86) | 0.93(0.85, 1.01)  |  |
| Resolved                                  | 366,171   | 1,474  | 885,473                      | 1.66 | 0.87(0.82, 0.91) | 0.90(0.84, 0.96) | 0.90 (0.83, 0.98) |  |
| Persistent                                | 703,234   | 3,052  | 1,695,474                    | 1.80 | 1 [Reference]    | 1 [Reference]    | 1 [Reference]     |  |
| Abnormal blood pressure <sup>c</sup>      |           |        |                              |      |                  |                  |                   |  |
| Never                                     | 2,440,459 | 4,387  | 5,834,734                    | 0.75 | 0.73(0.71, 0.76) | 0.62(0.60, 0.65) | 0.84 (0.80, 0.89) |  |
| Developed                                 | 813,867   | 2,197  | 1,954,729                    | 1.12 | 0.86(0.83, 0.90) | 0.82(0.78, 0.86) | 0.93(0.87, 0.99)  |  |
| Resolved                                  | 632,632   | 1,687  | 1,518,393                    | 1.11 | 0.87(0.83, 0.90) | 0.82(0.78, 0.86) | 0.95 (0.88, 1.03) |  |
| Persistent                                | 1,817,653 | 8,183  | 4,401,502                    | 1.86 | 1 [Reference]    | 1 [Reference]    | 1 [Reference]     |  |
| Abnormal fasting glucose <sup>c</sup>     |           |        |                              |      |                  |                  |                   |  |
| Never                                     | 3,065,966 | 6,723  | 7,363,893                    | 0.91 | 0.76(0.73, 0.78) | 0.70(0.67, 0.73) | 0.84(0.79, 0.88)  |  |
| Developed                                 | 904,834   | 2,802  | 2,174,012                    | 1.29 | 0.82(0.79, 0.85) | 0.77(0.73, 0.81) | 0.92(0.86, 0.98)  |  |
| Resolved                                  | 638,547   | 1,888  | 1,531,460                    | 1.23 | 0.84(0.80, 0.88) | 0.81(0.76, 0.85) | 0.90(0.83, 0.97)  |  |
| Persistent                                | 1,095,264 | 5,041  | 2,639,993                    | 1.91 | 1 [Reference]    | 1 [Reference]    | 1 [Reference]     |  |
| Abnormal TG criterion <sup>c</sup>        |           |        |                              |      |                  |                  |                   |  |
| Never                                     | 2,844,681 | 6,747  | 6,818,793                    | 0.99 | 0.87(0.85, 0.90) | 0.84(0.81, 0.87) | 0.89(0.84, 0.93)  |  |
| Developed                                 | 852,,405  | 2,471  | 2,048,462                    | 1.21 | 0.88(0.85, 0.92) | 0.86(0.82, 0.90) | 0.91(0.85, 0.97)  |  |
| Resolved                                  | 591574    | 1,935  | 1,428,350                    | 1.35 | 0.91(0.87, 0.95) | 0.82(0.78, 0.87) | 0.96 (0.89, 1.04) |  |

|                                             |           |       |           |      |                  |                  |                  |
|---------------------------------------------|-----------|-------|-----------|------|------------------|------------------|------------------|
| Persistent                                  | 1415951   | 5,301 | 3,413,753 | 1.55 | 1 [Reference]    | 1 [Reference]    | 1 [Reference]    |
| <i>Abnormal HDL cholesterol<sup>c</sup></i> |           |       |           |      |                  |                  |                  |
| Never                                       | 3,356,868 | 7,942 | 8,019,166 | 0.99 | 0.91(0.88, 0.94) | 0.91(0.87, 0.96) | 0.92(0.88, 0.97) |
| Developed                                   | 826,033   | 2,836 | 1,990,435 | 1.42 | 1.00(0.96, 1.04) | 1.06(1.01, 1.13) | 0.94(0.88, 1.00) |
| Resolved                                    | 552,854   | 1,693 | 1,336,252 | 1.27 | 0.91(0.87, 0.96) | 1.02(0.96, 1.09) | 0.87(0.81, 0.93) |
| Persistent                                  | 968,856   | 3,983 | 2,363,504 | 1.69 | 1 [Reference]    | 1 [Reference]    | 1 [Reference]    |

<sup>a</sup> per 1000 person-years.

<sup>b</sup> Adjusted for age, sex, smoking, alcohol consumption and regular exercise habit at the 2011's examination

<sup>c</sup> Based on the definition of metabolic syndrome; Obesity was defined as a body mass index  $\geq 25$  kg/m<sup>2</sup>; diabetes mellitus was defined as fasting glucose levels  $\geq 126$  mg/dL measured during medical screening or antidiabetic drug prescriptions in conjunction with ICD-10-CM codes E11–E14; dyslipidemia was defined as total cholesterol levels  $\geq 240$  mg/dL or ICD-10-CM code E78 and claims for lipid-lowering agents; hypertension was defined as systolic blood pressure  $\geq 140$  mmHg, diastolic blood pressure  $\geq 90$  mmHg, or ICD-10-CM codes I10–I13 or I15 and claims for antihypertensive agents.

BP, blood pressure; HDL-C, high-density lipoprotein cholesterol; ICD-10-CM, International Classification of

Diseases, 10th Revision, Clinical Modification; LDL-C, low-density lipoprotein; F/U, Follow-up duration; IR, incidence rate; HR, hazard ratio; CI, confidence interval; TG, triglyceride

**Supplementary Table S3.** Hazard ratios and 95% confidence intervals of colorectal cancer development according to the change of abdominal obesity and accompanied the other metabolic syndrome component

| The second component <sup>a</sup> |                  |                     |                 |                             |                    |                 |                             |         |                 |                             |         |                 |                             |
|-----------------------------------|------------------|---------------------|-----------------|-----------------------------|--------------------|-----------------|-----------------------------|---------|-----------------|-----------------------------|---------|-----------------|-----------------------------|
| Abdominal obesity                 | Second component | High blood pressure |                 |                             | High blood glucose |                 |                             | High TG |                 |                             | Low HDL |                 |                             |
|                                   |                  | CRC                 | IR <sup>b</sup> | HR <sup>c</sup><br>(95% CI) | CRC                | IR <sup>b</sup> | HR <sup>c</sup><br>(95% CI) | CRC     | IR <sup>b</sup> | HR <sup>c</sup><br>(95% CI) | CRC     | IR <sup>b</sup> | HR <sup>c</sup><br>(95% CI) |
| Free                              | Free             | 5090                | 0.73            | 1 [Reference]               | 6961               | 0.85            | 1 [Reference]               | 7224    | 0.90            | 1 [Reference]               | 8267    | 0.92            | 1 [Reference]               |
|                                   | Developed        | 2125                | 1.10            | 1.13(1.08, 1.19)            | 2523               | 1.21            | 1.10(1.05, 1.15)            | 2205    | 1.12            | 1.01(0.97, 1.06)            | 2369    | 1.30            | 1.09(1.04, 1.14)            |
|                                   | Resolved         | 1660                | 1.06            | 1.14(1.08, 1.21)            | 1720               | 1.10            | 1.08(1.02, 1.13)            | 1728    | 1.26            | 1.02(0.97, 1.07)            | 1493    | 1.14            | 1.06(1.00, 1.12)            |
|                                   | Persistent       | 6101                | 1.72            | 1.30(1.25, 1.35)            | 3772               | 1.75            | 1.31(1.26, 1.36)            | 3819    | 1.43            | 1.14(1.09, 1.18)            | 2847    | 1.49            | 1.06(1.02, 1.11)            |
| Developed                         | Free             | 429                 | 0.82            | 1.04(0.95, 1.15)            | 854                | 1.06            | 1.10(1.02, 1.18)            | 778     | 1.27            | 1.19(1.11, 1.28)            | 927     | 1.09            | 1.08(1.01, 1.16)            |
|                                   | Developed        | 358                 | 1.16            | 1.19(1.07, 1.33)            | 456                | 1.35            | 1.21(1.10, 1.33)            | 405     | 1.12            | 1.01(0.91, 1.11)            | 457     | 1.41            | 1.12(1.02, 1.23)            |
|                                   | Resolved         | 194                 | 1.09            | 1.18(1.02, 1.36)            | 260                | 1.40            | 1.25(1.10, 1.41)            | 224     | 1.39            | 1.08(0.95, 1.24)            | 220     | 1.36            | 1.08(0.95, 1.24)            |
|                                   | Persistent       | 1276                | 1.82            | 1.35(1.27, 1.43)            | 687                | 1.78            | 1.25(1.16, 1.36)            | 850     | 1.47            | 1.14(1.06, 1.22)            | 653     | 1.73            | 1.18(1.09, 1.28)            |
| Resolved                          | Free             | 341                 | 1.00            | 0.85(0.76, 0.95)            | 680                | 1.30            | 1.11(1.03, 1.20)            | 636     | 1.52            | 0.99(0.91, 1.08)            | 840     | 1.49            | 1.22(1.13, 1.31)            |
|                                   | Developed        | 240                 | 1.43            | 1.24(1.09, 1.41)            | 326                | 1.63            | 0.92(0.82, 1.04)            | 286     | 1.68            | 1.17(1.04, 1.31)            | 375     | 1.81            | 1.21(1.09, 1.34)            |
|                                   | Resolved         | 226                 | 1.42            | 1.27(1.11, 1.45)            | 265                | 1.66            | 1.29(1.14, 1.46)            | 305     | 1.52            | 1.12(1.00, 1.26)            | 227     | 1.44            | 0.71(0.61, 0.81)            |
|                                   | Persistent       | 1275                | 2.19            | 1.44(1.35, 1.53)            | 811                | 2.20            | 1.43(1.33, 1.53)            | 855     | 1.85            | 1.27(1.18, 1.36)            | 640     | 1.98            | 1.21(1.12, 1.32)            |
| Persistent                        | Free             | 478                 | 1.11            | 1.18(1.08, 1.30)            | 1211               | 1.41            | 1.23(1.16, 1.31)            | 1101    | 1.79            | 1.36(1.27, 1.44)            | 1448    | 1.52            | 1.28(1.21, 1.35)            |
|                                   | Developed        | 523                 | 1.49            | 1.39(1.27, 1.52)            | 748                | 1.63            | 1.31(1.21, 1.41)            | 650     | 1.67            | 1.23(1.13, 1.33)            | 894     | 1.95            | 1.36(1.27, 1.46)            |
|                                   | Resolved         | 349                 | 1.44            | 1.39(1.25, 1.55)            | 451                | 1.73            | 1.36(1.23, 1.49)            | 531     | 1.87            | 1.32(1.21, 1.44)            | 485     | 1.85            | 1.32(1.20, 1.45)            |
|                                   | Persistent       | 2979                | 2.18            | 1.53(1.46, 1.60)            | 1919               | 2.34            | 1.55(1.47, 1.63)            | 2047    | 1.85            | 1.32(1.26, 1.39)            | 1502    | 2.08            | 1.30(1.23, 1.38)            |

IR, incidence rate; HR, hazard ratio; CI, confidence interval; TG, triglyceride; HDL, High-density lipoprotein

\*The non-metabolic syndrome group in both 2009 and 2011 exam was set as a reference

<sup>a</sup> Based on the definition of metabolic syndrome

<sup>b</sup> per 1000 person-years

<sup>c</sup>Adjusted for age, sex, smoking, alcohol consumption and regular exercise habit at the examination of 2011(index date)

**Supplementary Table S4.** Hazard ratios and 95% confidence intervals of colorectal cancer according to the change of metabolic syndrome status (body mass index was cooperated into covariates)

|                               | N       | CRC (n) | Follow-up duration <sup>a</sup> | IR <sup>b</sup> | HR <sup>c</sup> (95% CI) |
|-------------------------------|---------|---------|---------------------------------|-----------------|--------------------------|
| Metabolic syndrome            |         |         |                                 |                 |                          |
| Free                          | 3481564 | 7318    | 8332787                         | 0.88            | 1[Reference]             |
| Developed                     | 760929  | 2535    | 1829845                         | 1.39            | 1.17(1.11,1.22)          |
| Resolved                      | 432190  | 1616    | 1043387                         | 1.55            | 1.24(1.18,1.31)          |
| Persistent                    | 1029928 | 4985    | 2503339                         | 1.99            | 1.36(1.30,1.41)          |
| Waist circumference criterion |         |         |                                 |                 |                          |
| Free                          | 4130496 | 10396   | 9916033                         | 1.05            | 1[Reference]             |
| Developed                     | 504710  | 1532    | 1212377                         | 1.26            | 1.08(1.02,1.14)          |
| Resolved                      | 366171  | 1474    | 885473                          | 1.66            | 1.13(1.07,1.20)          |
| Persistent                    | 703234  | 3052    | 1695474                         | 1.80            | 1.32(1.26,1.40)          |
| Blood pressure criterion      |         |         |                                 |                 |                          |
| Free                          | 2440459 | 4387    | 5834734                         | 0.75            | 1[Reference]             |
| Developed                     | 813867  | 2197    | 1954729                         | 1.12            | 1.14(1.08,1.20)          |
| Resolved                      | 632632  | 1687    | 1518393                         | 1.11            | 1.18(1.11,1.24)          |
| Persistent                    | 1817653 | 8183    | 4401502                         | 1.86            | 1.36 (1.31,1.42)         |
| Fasting glucose criterion     |         |         |                                 |                 |                          |
| Free                          | 3065966 | 6723    | 7363893                         | 0.91            | 1[Reference]             |
| Developed                     | 904834  | 2802    | 2174012                         | 1.29            | 1.07(1.02,1.11)          |
| Resolved                      | 638547  | 1888    | 1531460                         | 1.23            | 1.11(1.06,1.17)          |
| Persistent                    | 1095264 | 5041    | 2639993                         | 1.91            | 1.32(1.27,1.37)          |
| TG criterion                  |         |         |                                 |                 |                          |
| Free                          | 2844681 | 6747    | 6818793                         | 0.99            | 1[Reference]             |
| Developed                     | 852405  | 2471    | 2048462                         | 1.21            | 1.00(0.96,1.05)          |
| Resolved                      | 591574  | 1935    | 1428350                         | 1.35            | 1.02(0.97,1.08)          |
| Persistent                    | 1415951 | 5301    | 3413753                         | 1.55            | 1.13(1.09,1.18)          |
| HDL cholesterol criterion     |         |         |                                 |                 |                          |
| Free                          | 3356868 | 7942    | 8019166                         | 0.99            | 1[Reference]             |
| Developed                     | 826033  | 2836    | 1990435                         | 1.42            | 1.09(1.04,1.13)          |
| Resolved                      | 552854  | 1693    | 1336252                         | 1.27            | 1.00(0.95,1.06)          |
| Persistent                    | 968856  | 3983    | 2363504                         | 1.69            | 1.10(1.05,1.14)          |

The non-metabolic syndrome group in both 2009 and 2011 exam was set as a reference

<sup>a</sup> person-years

<sup>b</sup> Colorectal cancer incidence per 1000 person-years

<sup>c</sup> Adjusted for age, sex, smoking status, alcohol consumption, and regular physical exercise and body mass index
