# Supplementary material for: Alteration of Metabolic Syndrome Is Associated with the Decreased Risk of Colorectal Cancer
Source: MDPI journal article supplement (doi:10.3390/jcm12154889), 2023-07-25
Supplement: s1 [file s1]

## Health checkup questionnaire

|                 |  |                    |  |                                        |                                                               |
|-----------------|--|--------------------|--|----------------------------------------|---------------------------------------------------------------|
| Last Name       |  | Resident Reg. No.. |  |                                        |                                                               |
| Given Name      |  |                    |  | Mobile phone                           |                                                               |
| Current address |  |                    |  | E-mail                                 |                                                               |
|                 |  |                    |  | How to receive a health checkup report | <input type="checkbox"/> Post <input type="checkbox"/> E-mail |

※ Please answer all the questions below.

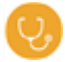

### Medical history (disease history, family history)

1. Have you ever been diagnosed by a doctor with any of the following diseases or are you currently taking any medication?

|                           | Diagnosis |    | Medication therapy |    |
|---------------------------|-----------|----|--------------------|----|
|                           | Yes       | No | Yes                | No |
| Brain stroke (paralysis)  |           |    |                    |    |
| Cardiac infarction/angina |           |    |                    |    |
| High blood pressure       |           |    |                    |    |
| Diabetes                  |           |    |                    |    |
| Dyslipidemia              |           |    |                    |    |
| Tuberculosis              |           |    |                    |    |
| Others (including cancer) |           |    |                    |    |

2. Has anyone in your family died from or gotten any of the following diseases?

|                           |     |    |
|---------------------------|-----|----|
| Brain stroke (paralysis)  | Yes | No |
| Cardiac infarction/angina | Yes | No |
| High blood pressure       | Yes | No |
| Diabetes                  | Yes | No |
| Others (including cancer) | Yes | No |

3. Are you a Hepatitis B virus antigen carrier?  
 ① Yes                      ② No                      ③ No idea

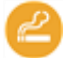

### Smoking and e-cigarettes (vaping)

4. Have you ever smoked more than 5 packs of cigarettes (100 cigarettes) in your lifetime?  
 ① No. (→ Go to Question 5)  
 ② Yes. (→ Go to Question 4-1)

#### 4-1. Do you smoke cigarettes now?

|                             |                        |                                                 |                          |
|-----------------------------|------------------------|-------------------------------------------------|--------------------------|
| ① I do                      | A total of _____ years | An average of _____ cigarettes a day            |                          |
| ② I used to but not anymore | A total of _____ years | Used to smoke _____ cigarettes a day on average | _____ years since I quit |

5. Have you ever smoked an electronic cigarette (e.g., IQOS, Glo, or Lil)?  
 ① No. (→ Go to Question 6)  
 ② Yes. (→ Go to Question 5-1)

#### 5-1. Do you smoke electronic cigarettes now?

|                             |                        |                                                 |                          |
|-----------------------------|------------------------|-------------------------------------------------|--------------------------|
| ① I do                      | A total of _____ years | An average of _____ cigarettes a day            |                          |
| ② I used to but not anymore | A total of _____ years | Used to smoke _____ cigarettes a day on average | _____ years since I quit |

### 6. Have you ever used a liquid electronic cigarette?

- ① No.  
 ② Yes. (→ Go to Question 6-1)

#### 6-1. Have you used a liquid electronic cigarette in the last month?

- ① No                      ② 1 to 2 days per month                      ③ 3 to 9 days per month  
 ④ 10 to 29 days per month                      ⑤ Every day

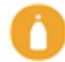

### Drinking

※ In the past one year

7. How often do you have drinks containing alcohol? (Select one)  
 ① ( ) times per week                      ② ( ) times per month  
 ③ ( ) times per year  
 ④ I don't drink alcohol.

- 7-1. How many drinks containing alcohol do you have on a typical day when you are drinking?

\* Choose one among the glass, bottle, can, or cc (you can choose more than one for liquor types; choose a similar type for other liquor types that are not indicated)

| Type of liquor        | Glass | Bottle | Can | cc |
|-----------------------|-------|--------|-----|----|
| Soju                  |       |        |     |    |
| Beer                  |       |        |     |    |
| Hard liquor           |       |        |     |    |
| Makgeolli (rice wine) |       |        |     |    |
| Wine                  |       |        |     |    |

- 7-2. What is the largest amount of drinks containing alcohol that you have ever had in one day?

\* Choose one among the glass, bottle, can, or cc (you can choose more than one for liquor types; choose a similar type for other liquor types that are not indicated)

| Type of liquor        | Glass | Bottle | Can | cc |
|-----------------------|-------|--------|-----|----|
| Soju                  |       |        |     |    |
| Beer                  |       |        |     |    |
| Hard liquor           |       |        |     |    |
| Makgeolli (rice wine) |       |        |     |    |
| Wine                  |       |        |     |    |

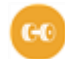

### Exercising

- 8-1. How often do you do high intensity exercise (making you short of breath) per week?

( ) days per week

\* Examples of high intensity exercise> Running, aerobics, fast bicycling, construction labor, carrying items using stairs, etc.

- 8-2. How long do you do high intensity exercise (making you short of breath) per day?

( ) hours ( ) minutes per day

- 9-1. How often do you do moderate intensity exercise (making you slightly short of breath) per week?

( ) days per week

\* Exclude exercise you have already written in Question 8

\* Examples of moderate intensity exercise> Power walking, doubles tennis games, cycling at normal speed, carrying light items, cleaning, etc.

- 9-2. How long do you do moderate intensity exercise (making you slightly short of breath) per day?

( ) hours ( ) minutes per day

10. How many days did you do weight training such as push-ups, sit-ups, dumbbell exercises, weight lifting, or horizontal bar exercise in the last one week?

( ) days per week
